# Supplementary material for: Structure‐Activity Relationship and Mode‐Of‐Action Studies Highlight 1‐(4‐Biphenylylmethyl)‐1H‐imidazole‐Derived Small Molecules as Potent CYP121 Inhibitors
Source: PubMed Central journal article supplement — ChemMedChem. 2021 Jun 22;16(18):2786–801. doi: 10.1002/cmdc.202100283 (PMC8519103; doi:10.1002/cmdc.202100283), 2021-06-22
Supplement: CMDC-16-2786-s001.pdf [file CMDC-16-2786-s001.pdf]

# ChemMedChem

Supporting Information

## **Structure-Activity Relationship and Mode-Of-Action Studies Highlight 1-(4-Biphenylmethyl)-1*H*-imidazole-Derived Small Molecules as Potent CYP121 Inhibitors**

Isabell Walter<sup>+</sup>, Sebastian Adam<sup>+</sup>, Maria Virginia Gentilini, Andreas M. Kany,  
Christian Brengel, Andreas Thomann, Tim Sparwasser, Jesko Köhnke, and Rolf W. Hartmann\*

## Supporting Information

### 1. Screening Overview: $K_D$ and $MIC_{50}$ values

**Table S1:** Determined  $K_D$  values with standard deviation and  $MIC_{50}$  values against *M. bovis* BCG.  $K_D \pm$  STD for compounds appearing in the main text was calculated from 4 biological replicates, for all other compounds from 2 biological replicates.

| Compound  | Structure                                                                           | $K_D \pm$ STD [ $\mu$ M] | $MIC_{50}$ [ $\mu$ M] |
|-----------|-------------------------------------------------------------------------------------|--------------------------|-----------------------|
| I:47      | 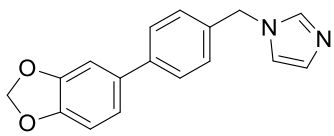   | $5.4 \pm 1.0$            | 4.0                   |
| Econazole |    | $2.8 \pm 0.2$            | 12.7                  |
| L1        |  | $1.4 \pm 0.22$           |                       |
| L2        |  | $7.4 \pm 2.3$            |                       |
| L3        |  | $34.0 \pm 8.9$           |                       |
| L4        |  |                          |                       |
| L5        |  | $6.5 \pm 2.7$            |                       |

|            |                                                                                     |                 |      |
|------------|-------------------------------------------------------------------------------------|-----------------|------|
| <b>L6</b>  | 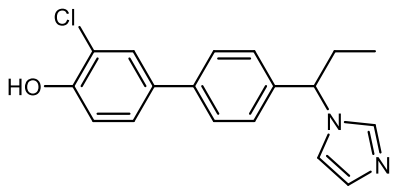   | $19.4 \pm 13.4$ |      |
| <b>L7</b>  |    | $2.0 \pm 0.44$  |      |
| <b>L8</b>  |    | $2.7 \pm 0.52$  | 18.4 |
| <b>L9</b>  |   | $2.9 \pm 1.2$   | 36.1 |
| <b>L10</b> |  | $2.9 \pm 0.38$  | 2.6  |
| <b>L11</b> |  | $1.5 \pm 0.46$  |      |
| <b>L12</b> |  | $2.4 \pm 0.19$  | 7.6  |
| <b>L13</b> |  | $14.0 \pm 2.0$  |      |

|            |                                                                                     |                |      |
|------------|-------------------------------------------------------------------------------------|----------------|------|
| <b>L14</b> | 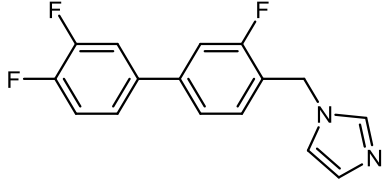   | $6.4 \pm 0.85$ | 2.7  |
| <b>L15</b> |    | $4.3 \pm 0.78$ | 1.8  |
| <b>L16</b> |    | $0.5 \pm 0.09$ | 7.4  |
| <b>L17</b> |    | $1.4 \pm 0.20$ |      |
| <b>L18</b> |  | $8.0 \pm 1.3$  |      |
| <b>L19</b> |  | $4.8 \pm 0.84$ | 20.2 |
| <b>L20</b> |  | $5.0 \pm 1.5$  |      |
| <b>L21</b> |  | $5.9 \pm 0.55$ | 1.5  |
| <b>L22</b> |  | $5.0 \pm 0.49$ |      |

|     |                                                                                     |                |  |
|-----|-------------------------------------------------------------------------------------|----------------|--|
| L23 | 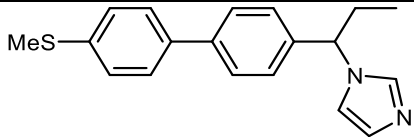   | $3.0 \pm 0.74$ |  |
| L24 |    | $3.1 \pm 0.73$ |  |
| L25 |    |                |  |
| L26 |   | $9.0 \pm 1.3$  |  |
| L27 |  | $8.9 \pm 0.54$ |  |
| L28 |  |                |  |
| L29 |  |                |  |
| L30 |  | $7.5 \pm 0.86$ |  |

|            |                                                                                     |                 |  |
|------------|-------------------------------------------------------------------------------------|-----------------|--|
| <b>L31</b> | 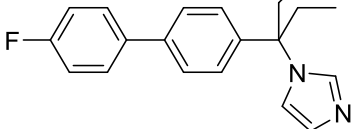   |                 |  |
| <b>L32</b> |    | $8.7 \pm 1.2$   |  |
| <b>L33</b> |    | $18.3 \pm 1.7$  |  |
| <b>L34</b> |    | $4.1 \pm 0.91$  |  |
| <b>L35</b> |  | $2.5 \pm 0.57$  |  |
| <b>L36</b> |  | $16.9 \pm 2.2$  |  |
| <b>L37</b> |  | $4.5 \pm 0.88$  |  |
| <b>L38</b> |  | $9.4 \pm 0.66$  |  |
| <b>L39</b> |  | $32.9 \pm 11.1$ |  |

|     |                                                                                     |            |      |
|-----|-------------------------------------------------------------------------------------|------------|------|
| L40 | 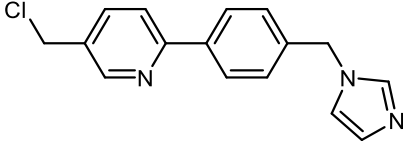   |            |      |
| L41 |    | 5.3 ± 0.68 | 13.2 |
| L42 |    | 6.3 ± 1.1  |      |
| L43 |    |            |      |
| L44 |   | 5.6 ± 0.93 | 2.4  |
| L45 |  | 12.6 ± 2.0 | 3.4  |
| L46 |  | 9.2 ± 1.5  | 2.9  |
| L47 |  | 7.4 ± 0.80 | 6.0  |
| L48 |  | 5.9 ± 2.0  | 6.1  |

|     |                                                                                     |            |     |
|-----|-------------------------------------------------------------------------------------|------------|-----|
| L49 | 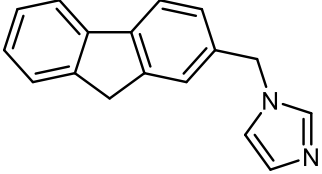   | 6.0 ± 1.1  | 6.7 |
| L50 |    | 4.8 ± 0.78 |     |
| L51 |    |            |     |
| L52 |   |            |     |
| L53 |  | 5.3 ± 1.2  |     |
| L54 |  | 4.6 ± 0.70 |     |
| L55 |  | 8.7 ± 1.3  |     |
| L56 |  | 7.5 ± 0.80 |     |



|            |                                                                                     |                |     |
|------------|-------------------------------------------------------------------------------------|----------------|-----|
| <b>L57</b> | 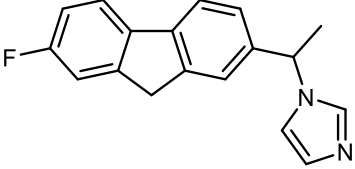   | $17.0 \pm 2.0$ |     |
| <b>L58</b> |    | $19.6 \pm 4.4$ |     |
| <b>L59</b> |    |                |     |
| <b>L60</b> |    | $9.1 \pm 1.5$  | 7.0 |
| <b>L61</b> |    |                |     |
| <b>L62</b> |  | $28.3 \pm 3.7$ |     |
| <b>L63</b> |  | $18.9 \pm 3.1$ |     |
| <b>L64</b> |  | $16.0 \pm 3.9$ |     |
| <b>L65</b> |  | $11.2 \pm 1.9$ |     |
| <b>L66</b> |  | $5.3 \pm 1.1$  | 5.1 |
| <b>L67</b> |  |                |     |
| <b>L68</b> |  |                |     |

|            |                                                                                     |                 |      |
|------------|-------------------------------------------------------------------------------------|-----------------|------|
| <b>L69</b> | 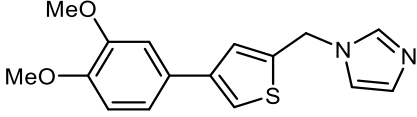   | $62.7 \pm 12.4$ |      |
| <b>L70</b> |    | $33.7 \pm 5.6$  |      |
| <b>L71</b> |    |                 |      |
| <b>L72</b> |    | $21.7 \pm 2.0$  |      |
| <b>L73</b> |    | $10.9 \pm 2.0$  | 4.5  |
| <b>L74</b> |  |                 |      |
| <b>L75</b> |  | $8.6 \pm 2.0$   | 8.6  |
| <b>L76</b> |  | $6.6 \pm 0.97$  | 3.2  |
| <b>L77</b> |  | $1.4 \pm 0.23$  | 14.7 |
| <b>L78</b> |  | $0.6 \pm 0.17$  | 2.4  |

|            |                                                                                     |                |      |
|------------|-------------------------------------------------------------------------------------|----------------|------|
| <b>L79</b> | 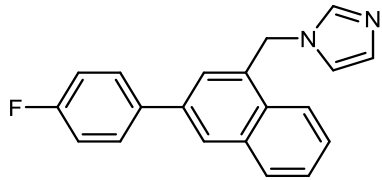   | $1.3 \pm 0.27$ | 29.8 |
| <b>L80</b> |    | $10.1 \pm 1.5$ |      |
| <b>L81</b> |    | $2.5 \pm 0.70$ |      |
| <b>L82</b> |    | $1.7 \pm 0.37$ |      |
| <b>L83</b> |   | $1.3 \pm 0.11$ |      |
| <b>L84</b> |  | $1.1 \pm 0.22$ | 36.4 |
| <b>L85</b> |  | $1.5 \pm 0.18$ |      |
| <b>L86</b> |  | $4.0 \pm 0.61$ |      |
| <b>L87</b> |  | $1.8 \pm 0.32$ |      |
| <b>L88</b> |  | $3.8 \pm 0.85$ |      |

|            |                                                                                     |                |      |
|------------|-------------------------------------------------------------------------------------|----------------|------|
| <b>L89</b> | 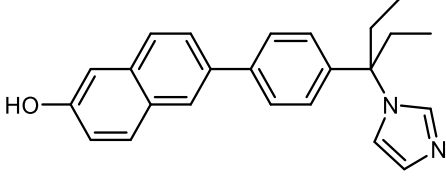   | $0.3 \pm 0.09$ | 21.7 |
| <b>L90</b> |    | $5.5 \pm 0.9$  | 6.9  |
| <b>L91</b> |    | $7.3 \pm 1.8$  | 10.9 |
| <b>L92</b> |   | $2.9 \pm 0.59$ |      |
| <b>L93</b> |  | $1.9 \pm 0.39$ |      |
| <b>L94</b> |  | $4.7 \pm 0.8$  | 3.3  |

## 2. Chemical Synthesis

### 2.1. Method A: Suzuki coupling

2.1.1: 4'-formyl-[1,1'-biphenyl]-4-carbonitrile (**S7b**): Synthesized according to method A using 4-bromobenzaldehyde (1.35 mmol; 250 mg) and 4-Cyanophenylboronic acid (1.75 mmol; 257 mg). Yield: 263 mg (94 %) of a white solid.  $R_f = 0.78$  (hexane : EtOAc = 7 : 3).  $^1\text{H-NMR}$  (300 MHz, CHLOROFORM- $d_3$ ):  $\delta$  (ppm) = 7.70 - 7.83 (m, 6 H); 7.97 - 8.05 (m, 2 H); 10.10 (s, 1 H).  $^{13}\text{C-NMR}$  (300 MHz, CHLOROFORM- $d_3$ ):  $\delta$  (ppm) = 112.2; 118.5; 127.9; 128.0; 130.4; 132.8; 136.1; 144.1; 144.9; 191.6. LC-MS (ESI):  $R_t = 8.39$  min;  $m/z = 415.28$   $[2\text{M}+\text{H}]^+$ .

2.1.2: 4-(benzo[d][1,3]dioxol-5-yl)-2-fluorobenzaldehyde (**S8b**): Synthesized according to method A using 4-bromo-2-fluorobenzaldehyde (1.35 mmol; 274 mg) and 3,4-methylenedioxyphenyl boronic acid (1.75 mmol; 290 mg). Yield: 311 mg (94 %) of a white-yellow solid.  $R_f = 0.47$  (hexane : EtOAc = 95 : 5).  $^1\text{H-NMR}$  (300 MHz, CHLOROFORM- $d_3$ ):  $\delta$  (ppm) = 6.05 (s, 2 H); 6.92 (d,  $J=8.1$  Hz, 1 H); 7.07 - 7.15 (m, 2 H); 7.32 (dd,  $J=11.8, 1.6$  Hz, 1 H); 7.43 (dd,  $J=8.1, 1.0$  Hz, 1 H); 7.87 - 7.94 (m, 1 H); 10.37 (s, 1 H).  $^{13}\text{C-NMR}$  (300 MHz, CHLOROFORM- $d_3$ ):  $\delta$  (ppm) = 101.6 (s); 107.4 (s); 108.9 (s); 114.3 (d,  $J=22.35$  Hz); 121.3 (s); 122.4 (d,  $J=8.9$  Hz); 122.9 (d,  $J=2.9$  Hz); 129.1 (d,  $J=2.9$  Hz); 132.7 (d,  $J=2.2$  Hz); 148.5 (s); 148.6 (s); 149.3 (d,  $J=8.9$  Hz); 164.9 (d,  $J=257.8$  Hz); 186.7 (d,  $J=5.9$  Hz). LC-MS (ESI):  $R_t = 8.38$  min;  $m/z = 244.98$   $[\text{M}+\text{H}]^+$ .

### 2.2 Method B: Grignard reaction

2.2.1: 1-(3'-fluoro-4'-methoxy-[1,1'-biphenyl]-4-yl)prop-2-en-1-ol (**S6a**): Synthesized according to method B using **S6b** (1.17 mmol; 270 mg) and vinylmagnesium bromide (0.7 M in THF; 1.40 mmol; 2.0 mL). Yield: 182 mg (60 %) of a yellow solid.  $R_f = 0.29$  (hexane : EtOAc = 8 : 2).  $^1\text{H-NMR}$  (300 MHz, CHLOROFORM- $d_3$ ):  $\delta$  (ppm) = 3.94 (s, 3 H); 5.21 - 5.29 (m, 2 H); 5.40 (d,  $J=17.0$  Hz, 1 H); 6.09 (ddd,  $J=16.8, 10.4, 6.0$  Hz, 1 H); 7.00 - 7.07 (m, 1 H); 7.29 - 7.37 (m, 2 H); 7.42 - 7.47 (m, 2 H); 7.50 - 7.57 (m, 2 H).  $^{13}\text{C-NMR}$  (300 MHz, CHLOROFORM- $d_3$ ):  $\delta$  (ppm) = 56.4 (s); 75.09 (s); 113.7 (d,  $J=2.2$  Hz); 114.7 (d,  $J=19.4$  Hz); 115.3 (s); 122.6 (d,  $J=3.0$  Hz); 126.8 (s); 126.9 (s); 134.0 (d,  $J=6.0$  Hz); 139.2 (d,  $J=1.5$  Hz); 140.1 (s); 141.6 (s); 147.1 (d,  $J=10.4$  Hz); 152.6 (d,  $J=244.4$  Hz). LC-MS (ESI):  $R_t = 7.21$  min;  $m/z = 241.14$   $[\text{M}-\text{OH}]^+$ .

2.2.2: 4'-(1-hydroxyallyl)-[1,1'-biphenyl]-4-carbonitrile (**S7a**): Synthesized according to method B using **S7b** (1.21 mmol; 250 mg) and vinylmagnesium bromide (0.7 M in THF; 1.45 mmol; 2.1 mL). Yield: 168 mg (59 %) of a yellow solid.  $R_f = 0.27$  (hexane : EtOAc = 8 : 2).  $^1\text{H-NMR}$  (300 MHz, CHLOROFORM- $d_3$ ):  $\delta$  (ppm) = 5.22 - 5.32 (m, 2 H); 5.41 (d,  $J=17.0$  Hz, 1 H); 6.08 (ddd,  $J=16.9, 10.4, 6.1$  Hz, 1 H); 7.51 (d,  $J=8.2$  Hz, 2 H); 7.60 (d,  $J=8.2$  Hz, 2 H); 7.71 (dd,  $J=15.1, 8.2$  Hz, 4 H).  $^{13}\text{C-NMR}$  (300 MHz, CHLOROFORM- $d_3$ ):  $\delta$  (ppm) = 75.0; 110.9; 115.6; 118.9; 127.0; 127.4; 127.7; 132.6; 138.5; 140.0; 143.1; 145.3. LC-MS (ESI):  $R_t = 7.10$  min;  $m/z = 218.15$   $[\text{M}-\text{OH}]^+$ .

2.2.3: 1-(4-(benzo[d][1,3]dioxol-5-yl)-2-fluorophenyl)prop-2-en-1-ol (**S8a**): Synthesized according to method B using **S8b** (1.23 mmol; 300 mg) and vinylmagnesium bromide (0.7 M in THF; 1.47 mmol; 2.1 mL). Yield: 127 mg (38 %) of a yellow solid.  $R_f = 0.38$  (hexane : EtOAc = 85 : 15).  $^1\text{H-NMR}$  (300 MHz, CHLOROFORM- $d_3$ ):  $\delta$  (ppm) = 2.14 (br. s., 1 H); 5.24 (d,  $J=10.3$  Hz, 1 H); 5.40 (dd,  $J=17.1, 0.6$  Hz, 1 H); 5.55 (d,  $J=5.3$  Hz, 1 H); 6.05 - 6.18 (m, 1 H); 6.85 - 6.92 (m, 1 H); 7.01 - 7.08 (m, 2 H); 7.20 (dd,  $J=11.6, 1.7$  Hz, 1 H); 7.31 (dd,  $J=8.0, 1.7$  Hz, 1 H); 7.43 - 7.52 (m, 1 H).  $^{13}\text{C-NMR}$  (300 MHz, CHLOROFORM- $d_3$ ):  $\delta$  (ppm) = 69.1 (s); 101.3 (s); 107.5 (s); 108.6 (s); 113.7 (d,  $J=23.1$  Hz); 115.4 (s); 120.6 (s); 122.6 (d,  $J=3.0$  Hz); 127.7 - 128.3 (m); 133.9 (d,  $J=2.2$  Hz); 138.8 (s); 142.4 (d,  $J=8.2$  Hz); 147.5 (s); 148.2 (s); 160.2 (d,  $J=248.1$  Hz).

2.2.4: 1-(4'-((tert-butyl)dimethylsilyloxy)-[1,1'-biphenyl]-4-yl)prop-2-en-1-ol (**S9b**): Synthesized according to method B using **S9c** (1.14 mmol; 357 mg) and vinylmagnesium bromide (0.7 M in THF; 1.37 mmol; 2.0 mL). Yield: 47 mg (47 %) of a yellow oil.  $R_f = 0.32$  (hexane : EtOAc = 9 : 1).  $^1\text{H-NMR}$  (300 MHz, CHLOROFORM- $d_3$ ):  $\delta$  (ppm) = 0.21 - 0.26 (m, 6 H); 0.98 - 1.03 (m, 9 H); 5.21 - 5.28 (m, 2 H); 5.40 (dt,  $J=17.1, 1.4$  Hz, 1 H); 6.10 (ddd,  $J=17.1, 10.3, 6.0$  Hz, 1 H); 6.88 - 6.94 (m, 2 H); 7.40 - 7.48 (m, 4 H); 7.53 - 7.58 (m, 2 H).  $^{13}\text{C-NMR}$  (300 MHz, CHLOROFORM- $d_3$ ):  $\delta$  (ppm) = -4.4; 18.2; 25.7; 75.2; 115.2; 120.3; 126.7; 126.9; 128.0; 133.8; 140.2; 140.5; 140.9; 155.3.

2.2.5: 1-(4-(1-(tert-butyldimethylsilyl)-1H-indol-5-yl)phenyl)prop-2-en-1-ol (**S10b**): Synthesized according to method B using **S10c** (1.18 mmol; 397 mg) and vinylmagnesium bromide (0.7 M in THF; 1.42 mmol; 2.0 mL). Yield: 302 mg (70 %) of a yellow oil.  $R_f = 0.43$  (hexane : EtOAc = 8 : 2).  $^1\text{H-NMR}$  (300 MHz, CHLOROFORM- $d_3$ ):  $\delta$  (ppm) = 0.63 (d,  $J=1.1$  Hz, 6 H); 0.96 (s, 9 H); 5.19 - 5.31 (m, 2 H); 5.42 (dd,  $J=17.1, 1.4$  Hz, 1 H); 6.06 - 6.20 (m, 1 H); 6.67 (d,  $J=3.2$  Hz, 1 H); 7.20 - 7.24 (m, 1 H); 7.37 - 7.49 (m, 3 H); 7.57 (d,  $J=8.6$  Hz, 1 H); 7.66 (d,  $J=7.5$  Hz, 2 H); 7.84 (s, 1 H). LC-MS (ESI):  $R_t = 10.82$  min;  $m/z = 346.27$  [M-OH] $^+$ .

### 2.3 Method C: CDI reaction

2.3.1 1-(1-(3'-fluoro-4'-methoxy-[1,1'-biphenyl]-4-yl)allyl)-1H-imidazole (**S6**): Synthesized according to method C using **S6a** (160 mg, 0.62 mmol) and CDI (301 mg, 1.86 mmol). Yield: 44 mg (23 %) of a colorless oil.  $R_f = 0.44$  (EtOAc : MeOH = 98 : 2).  $^1\text{H-NMR}$  (300 MHz, CHLOROFORM- $d_3$ ):  $\delta$ [ppm] = 3.94 (s, 3 H) 5.19 (d,  $J=17.04$  Hz, 1 H) 5.47 (d,  $J=10.24$  Hz, 1 H) 5.84 (d,  $J=6.24$  Hz, 1 H) 6.31 (ddd,  $J=16.86, 10.34, 6.33$  Hz, 1 H) 6.93 (s, 1 H) 7.00 - 7.09 (m, 1 H) 7.13 (s, 1 H) 7.22 - 7.38 (m, 4 H) 7.54 (d,  $J=8.20$  Hz, 2 H) 7.61 (s, 1 H).  $^{13}\text{C-NMR}$  (75 MHz, CHLOROFORM- $d_3$ ):  $\delta$ [ppm] = 56.3 (s), 63.3 (s), 113.7 (d,  $J=2.24$  Hz), 114.7 (d,  $J=18.63$  Hz), 118.6 (s), 119.5 (s), 122.6 (d,  $J=2.9$  Hz), 127.2 (s), 127.9 (s), 129.0 (s), 133.3 (d,  $J=5.9$  Hz), 135.5 (s), 136.6 (s), 136.9 (s), 139.9 (s), 147.3 (d,  $J=11.2$  Hz), 152.6 (d,  $J=248.1$  Hz). LC-MS (ESI):  $R_t = 2.73$  min,  $m/z = 309.18$  [M+H] $^+$ , 241.14 [M-Imidazole] $^+$ .

2.3.2 4'-(1-(1H-imidazol-1-yl)allyl)-[1,1'-biphenyl]-4-carbonitrile (**S7**): Synthesized according to method C using **S7a** (150 mg, 0.64 mmol) and CDI (310 mg, 1.92 mmol). Yield: 22 mg (34 %) of an orange oil.  $R_f = 0.22$  (100% EtOAc).  $^1\text{H-NMR}$  (300 MHz, CHLOROFORM- $d_3$ ):  $\delta$ [ppm] = 5.20 (dd,  $J=17.00, 0.61$  Hz, 1 H) 5.48 (d,  $J=10.24$  Hz, 1 H) 5.85 (d,  $J=6.24$  Hz, 1 H) 6.31 (ddd,  $J=16.90, 10.38, 6.33$  Hz, 1 H) 6.93 (s, 1 H) 7.12 (s, 1 H) 7.30 (d,  $J=8.38$  Hz, 2 H) 7.54 - 7.63 (m, 3 H) 7.64 - 7.78 (m, 4 H).  $^{13}\text{C-NMR}$  (75 MHz, CHLOROFORM- $d_3$ ):  $\delta$ [ppm] = 63.1, 111.3, 118.5, 118.7, 119.8, 127.7, 127.8, 128.2, 129.5, 132.7, 135.35, 136.6, 138.8, 139.4, 144.7. LC-MS (ESI):  $R_t = 7.70$  min,  $m/z = 286.08$  [M+H] $^+$ , 218.01 [M-Imidazole] $^+$ .

2.3.3 1-(1-(4-(benzo[d][1,3]dioxol-5-yl)-2-fluorophenyl)allyl)-1H-imidazole (**S8**): Synthesized according to method C using **S8a** (125 mg, 0.46 mmol) and CDI (224 mg, 1.38 mmol). Yield: 43 mg (29 %) of a colorless oil.  $R_f = 0.39$  (100% EtOAc).  $^1\text{H-NMR}$  (300 MHz, METHANOL- $d_4$ ):  $\delta$ [ppm] = 5.16 (d,  $J=16.86$  Hz, 1 H) 5.43 - 5.51 (m, 1 H) 5.99 (s, 2 H) 6.31 (d,  $J=6.05$  Hz, 1 H) 6.36 - 6.50 (m, 1 H) 6.87 - 6.93 (m, 1 H) 7.02 (t,  $J=1.12$  Hz, 1 H) 7.10 - 7.16 (m, 3 H) 7.27 - 7.40 (m, 2 H) 7.40 - 7.46 (m, 1 H) 7.74 (s, 1 H).  $^{13}\text{C-NMR}$  (75 MHz, METHANOL- $d_4$ ):  $\delta$ [ppm] = 58.7 (d,  $J=2.9$  Hz), 102.9 (s), 108.4 (s), 109.8 (s), 115.0 (d,  $J=22.4$  Hz), 119.8 (s), 120.3 (s), 122.0 (s), 124.1 (d,  $J=2.9$  Hz), 125.4 (d,  $J=14.2$  Hz), 129.1 (s), 130.5 (d,  $J=3.7$  Hz), 134.7 (d,  $J=1.5$  Hz), 136.2 (s), 138.0 (s), 145.3 (d,  $J=8.2$  Hz), 149.5 (s), 150.0 (s), 163.8 (s). LC-MS (ESI):  $R_t = 2.95$  min,  $m/z = 323.12$  [M+H] $^+$ , 254.99 [M-Imidazole] $^+$ .

2.3.4 1-(1-(4'-((tert-butyldimethylsilyl)oxy)-[1,1'-biphenyl]-4-yl)allyl)-1H-imidazole (**S9a**): Synthesized according to method C using **S9b** (175 mg, 0.51 mmol) and CDI (249 mg, 1.53 mmol). Yield: 58 mg (29 %) of a colorless oil.  $R_f = 0.31$  (100% EtOAc).  $^1\text{H-NMR}$  (300 MHz, CHLOROFORM- $d_3$ ):  $\delta$ [ppm] = 0.24 (s, 6 H); 1.01 (s, 9 H) 5.18 (d,  $J=17.0$  Hz, 1 H); 5.45 (d,  $J=10.2$  Hz, 1 H); 5.81 (d,  $J=6.3$  Hz, 1 H); 6.31 (ddd,  $J=16.9, 10.4, 6.3$  Hz, 1 H); 6.88 - 6.94 (m, 3 H); 7.11 (s, 1 H); 7.24 (d,  $J=8.4$  Hz, 2 H); 7.43 - 7.48 (m, 2 H); 7.53 - 7.58 (m, 3 H).

3.10 5-(4-(1-(1H-imidazol-1-yl)allyl)phenyl)-1-(tert-butyldimethylsilyl)-1H-indole (**S10a**): Synthesized according to method C using **S10b** (302 mg, 0.83 mmol) and CDI (404 mg, 2.49 mmol). Yield: 106 mg (31 %) of a yellow oil.  $R_f = 0.31$  (100% EtOAc).

### 3. Synthesized Compounds: $K_D$ and $MIC_{50}$ values

**Table S3:** Determined  $K_D$  values with standard deviation and  $MIC_{50}$  values against *M. bovis* BCG.  $K_D \pm STD$  for compounds appearing in the main text was calculated from 4 biological replicates, for all other compounds from 2 biological replicates

| <b>Compound</b> | <b><math>K_D \pm STD</math> [<math>\mu M</math>]</b> | <b><math>MIC_{50}</math> [<math>\mu M</math>]</b> |
|-----------------|------------------------------------------------------|---------------------------------------------------|
| <b>S1</b>       | $0.8 \pm 0.8$                                        | 9.7                                               |
| <b>S2</b>       | $8.3 \pm 1.7$                                        | 49.9                                              |
| <b>S3</b>       | $21.3 \pm 1.1$                                       | >100                                              |
| <b>S4</b>       | $5.8 \pm 0.5$                                        | 17.3                                              |
| <b>S5</b>       | $6.7 \pm 0.6$                                        | 20.0                                              |
| <b>S6</b>       | $7.1 \pm 0.7$                                        | 14.5                                              |
| <b>S7</b>       | $10.0 \pm 1.4$                                       | 9.2                                               |
| <b>S8</b>       | $4.2 \pm 0.3$                                        | >30                                               |
| <b>S9</b>       | $7.2 \pm 0.5$                                        | >50                                               |
| <b>S10</b>      | $3.5 \pm 0.4$                                        | 41.0                                              |
| <b>S11</b>      | $5.9 \pm 0.5$                                        | 5.8                                               |

#### 4. Enantiomer separation and affinities of enantiomers

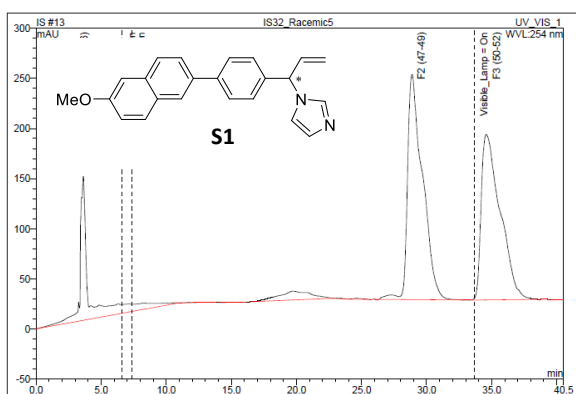

MtBE : Ethanol = 98 : 2

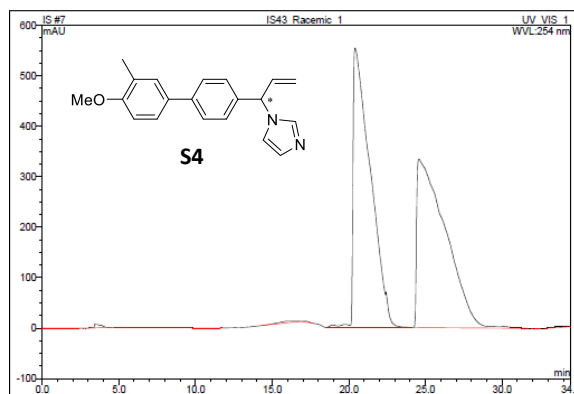

MtBE : Ethanol = 98 : 2

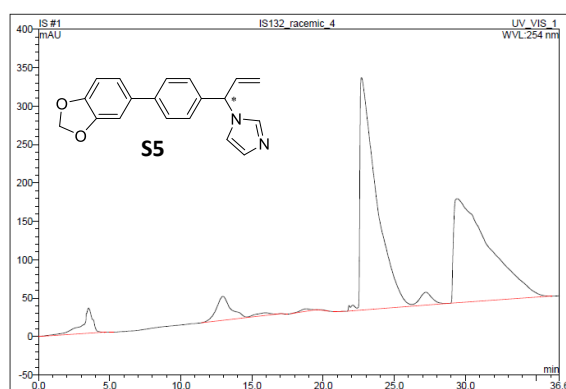

MtBE : Ethanol = 96 : 4

**Figure S4:** Chromatograms of enantiomer separation with a chiral column and used solvent composition.

**Table S4:** Determined  $K_D$  values for the separated enantiomers.

|           | $K_D$ [ $\mu$ M] |     |     |
|-----------|------------------|-----|-----|
|           | Rac.             | E1  | E2  |
| <b>S1</b> | 0.8              | 0.9 | 0.7 |
| <b>S4</b> | 5.8              | 6.1 | 2.6 |
| <b>S5</b> | 6.7              | 9.6 | 4.6 |



## 5. Complex crystal structures of L21, L44 and S2

Table S5: Data collection and refinement statistics

|                                                     | CYP121 – L21    | CYP121 – L44    | CYP121 – S2     |
|-----------------------------------------------------|-----------------|-----------------|-----------------|
| <b>Data collection</b>                              |                 |                 |                 |
| Space group                                         | P 65 2 2        | P 65 2 2        | P 65 2 2        |
| Cell dimensions                                     |                 |                 |                 |
| <i>a</i> , <i>b</i> , <i>c</i> (Å)                  | 77.7 77.7 264.7 | 77.6 77.6 264.2 | 77.5 77.5 263.8 |
| $\alpha$ , $\beta$ , $\gamma$ (°)                   | 90.0 90.0 120.0 | 90.0 90.0 120.0 | 90.0 90.0 120.0 |
| Resolution (Å)                                      | 87.82 – 1.50    | 47.09 – 1.70    | 47.03 – 1.50    |
|                                                     | (1.58 – 1.50)   | (1.79 – 1.70)   | (1.58 – 1.50)   |
| <i>R</i> <sub>merge</sub>                           | 0.119 (0.801)   | 0.089 (0.644)   | 0.093 (0.686)   |
| <i>I</i> / $\sigma$ <i>I</i>                        | 11.7 (2.4)      | 15.9 (3.0)      | 9.2 (2.0)       |
| Completeness (%)                                    | 100.0 (100.0)   | 100.0 (99.8)    | 99.9 (99.8)     |
| Redundancy                                          | 12.6 (13.0)     | 9.5 (8.7)       | 4.8 (5.0)       |
| <b>Refinement</b>                                   |                 |                 |                 |
| Resolution (Å)                                      | 67.31 – 1.50    | 41.53- 1.50     | 41.17 – 1.50    |
| No. reflections                                     | 76683 (7490)    | 52828 (5143)    | 75864 (7436)    |
| <i>R</i> <sub>work</sub> / <i>R</i> <sub>free</sub> | 0.1759/0.1990   | 0.1705/0.1886   | 0.1646/0.1840   |
| No. atoms                                           | 3592            | 3548            | 3647            |
| Protein                                             | 3031            | 3013            | 3015            |
| Ligand/ion                                          | 98              | 95              | 122             |
| Water                                               | 463             | 440             | 510             |
| <i>B</i> -factors                                   | 22.33           | 25.18           | 20.93           |
| Protein                                             | 20.84           | 23.65           | 19.15           |
| Ligand/ion                                          | 27.07           | 38.11           | 19.69           |
| Water                                               | 30.30           | 32.83           | 31.72           |
| R.m.s. deviations                                   |                 |                 |                 |
| Bond lengths (Å)                                    | 0.008           | 0.005           | 0.011           |
| Bond angles (°)                                     | 0.96            | 0.84            | 1.19            |
| Occupancy of inhibitor                              | 0.91            | 0.78            | 0.95            |

\*Values in parentheses are for the highest-resolution shell.

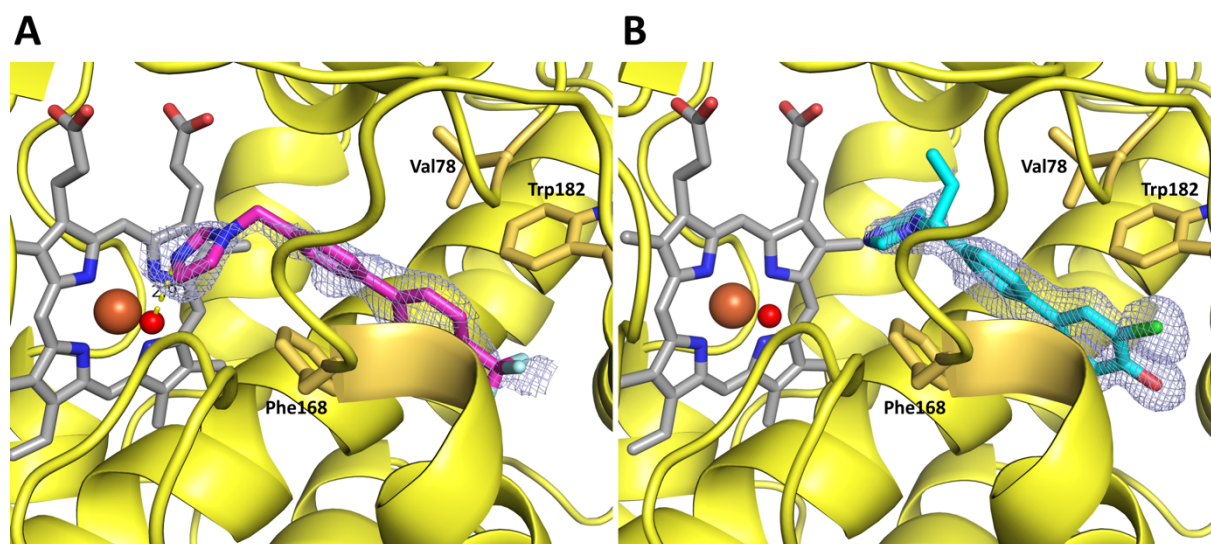

**Figure S5:** **A** Coordination of inhibitor **L44** (magenta) in the CYP121 crystal structure. **B** Coordination of inhibitor **S2** (cyan) in the CYP121 crystal structure. In both structures, the protein is shown as a yellow cartoon, inhibitor, heme b and interacting residues are shown as sticks. The heme iron is shown as a brown, the water ligand as a red sphere. The difference electron density maps of **L44** and **S2** ( $F_o - F_c$ ) were contoured at  $2.5\sigma$  (**L44**) and  $3\sigma$  (**S2**) respectively with phases calculated from a model that was refined in the absence of **L44** or **S2** and are shown as a blue isomesh. The hydrogen bond distance between the water ligand and the imidazole nitrogen of **L44** is  $2.9 \text{ \AA}$  and shown as a yellow dashed line.

## 6. Hydroxyl-Aspartate hydrogen bonding in the complex structure of S2

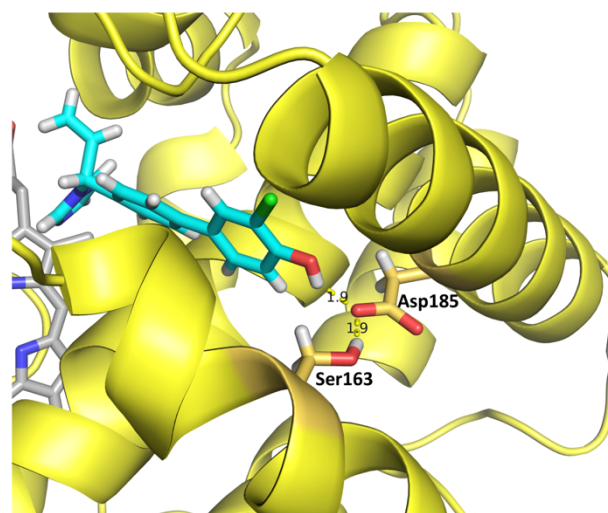

**Figure S6:** Observed hydrogen bonding between the para-hydroxyl group of **S2** and an aspartate side chain (**Asp185**) of CYP121, which also engages in conserved hydrogen bonding with a serine side chain (**Ser163**) of an adjacent  $\alpha$ -helix. The hydrogen bonding distance of both pairs is  $1.9 \text{ \AA}$ , probably preventing the imidazole motif of **S2** from reaching the heme b water ligand.

## 7. *In vitro* inhibition of cYY conversion: IC<sub>50</sub> values

**Table S7:** IC<sub>50</sub> values for reference compound econazole, hit compound **I:47** and the identified potent inhibitors **L10**, **L21** and **L15**.

| Compound    | IC <sub>50</sub> [μM] |                     |
|-------------|-----------------------|---------------------|
|             | Product formation     | Substrate depletion |
| Econazole   | 11                    | 8                   |
| <b>I:47</b> | 36                    | 34                  |
| <b>L10</b>  | 23                    | 19                  |
| <b>L21</b>  | 24                    | 21                  |
| <b>L15</b>  | 26                    | 21                  |

## 8. Cytotoxicity toward Macrophages

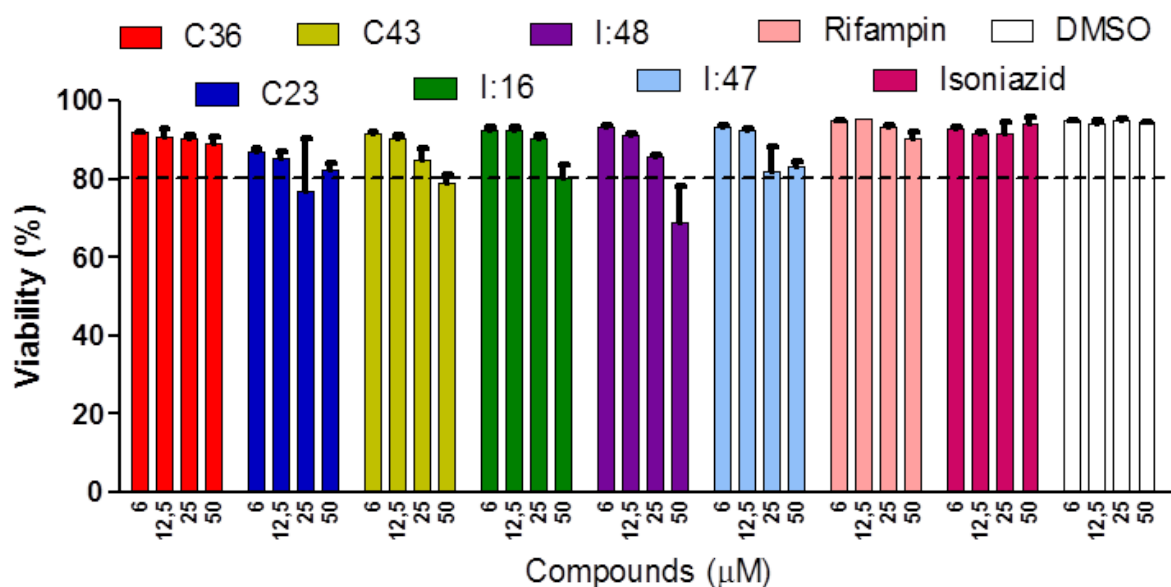

**Figure S8:** Cytotoxicity toward macrophages at compound concentrations of 50, 25, 12.5 and 6 μM after 48 h.

## 9. Intracellular Replication in Macrophages: Affinities toward CYP121 and CYP125

**Table S9:** Affinities toward CYP121 and CYP125 of compounds evaluated against intracellular replication in macrophages.<sup>1,2</sup>  $K_D \pm$  STD for compounds appearing in the main text was calculated from 4 biological replicates.

| Compound | Structure                                                                           | $K_D$ CYP121  | $K_D$ CYP125    |
|----------|-------------------------------------------------------------------------------------|---------------|-----------------|
|          |                                                                                     | [ $\mu$ M]    | [ $\mu$ M]      |
| C36      | 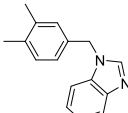   | >100          | 1.3 $\pm$ 0.7   |
| C23      |    | 7.2 $\pm$ 0.5 | 1.5 $\pm$ 0.6   |
| C43      |    | 8.8 $\pm$ 3.0 | 13.1 $\pm$ 0.9  |
| I:16     |  | 1.3 $\pm$ 0.4 | no SPR response |
| I:48     |  | 5.3 $\pm$ 0.6 | Not tested      |
| I:47     |  | 5.4 $\pm$ 1.0 | Not tested      |

## References

- (1) Brengel, C.; Thomann, A.; Schiffrin, A.; Eberhard, J.; Hartmann, R. W. Discovery and Biophysical Evaluation of First Low Nanomolar Hits Targeting CYP125 of *M. Tuberculosis*. *ChemMedChem* **2016**, *11* (21), 2385–2391. <https://doi.org/10.1002/cmdc.201600361>.
- (2) Brengel, C.; Thomann, A.; Schiffrin, A.; Allegretta, G.; Kamal, A. A. M.; Hauptenthal, J.; Schnorr, I.; Cho, S. H.; Franzblau, S. G.; Empting, M.; et al. Biophysical Screening of a Focused Library for the Discovery of CYP121 Inhibitors as Novel Antimycobacterials. *ChemMedChem* **2017**, *12* (19), 1616–1626. <https://doi.org/10.1002/cmdc.201700363>.
